# Supplementary figures and images for: Prophage-Derived Regions in Curtobacterium Genomes: Good Things, Small Packages
Source: MDPI journal article supplement (doi:10.3390/ijms24021586), 2023-01-13

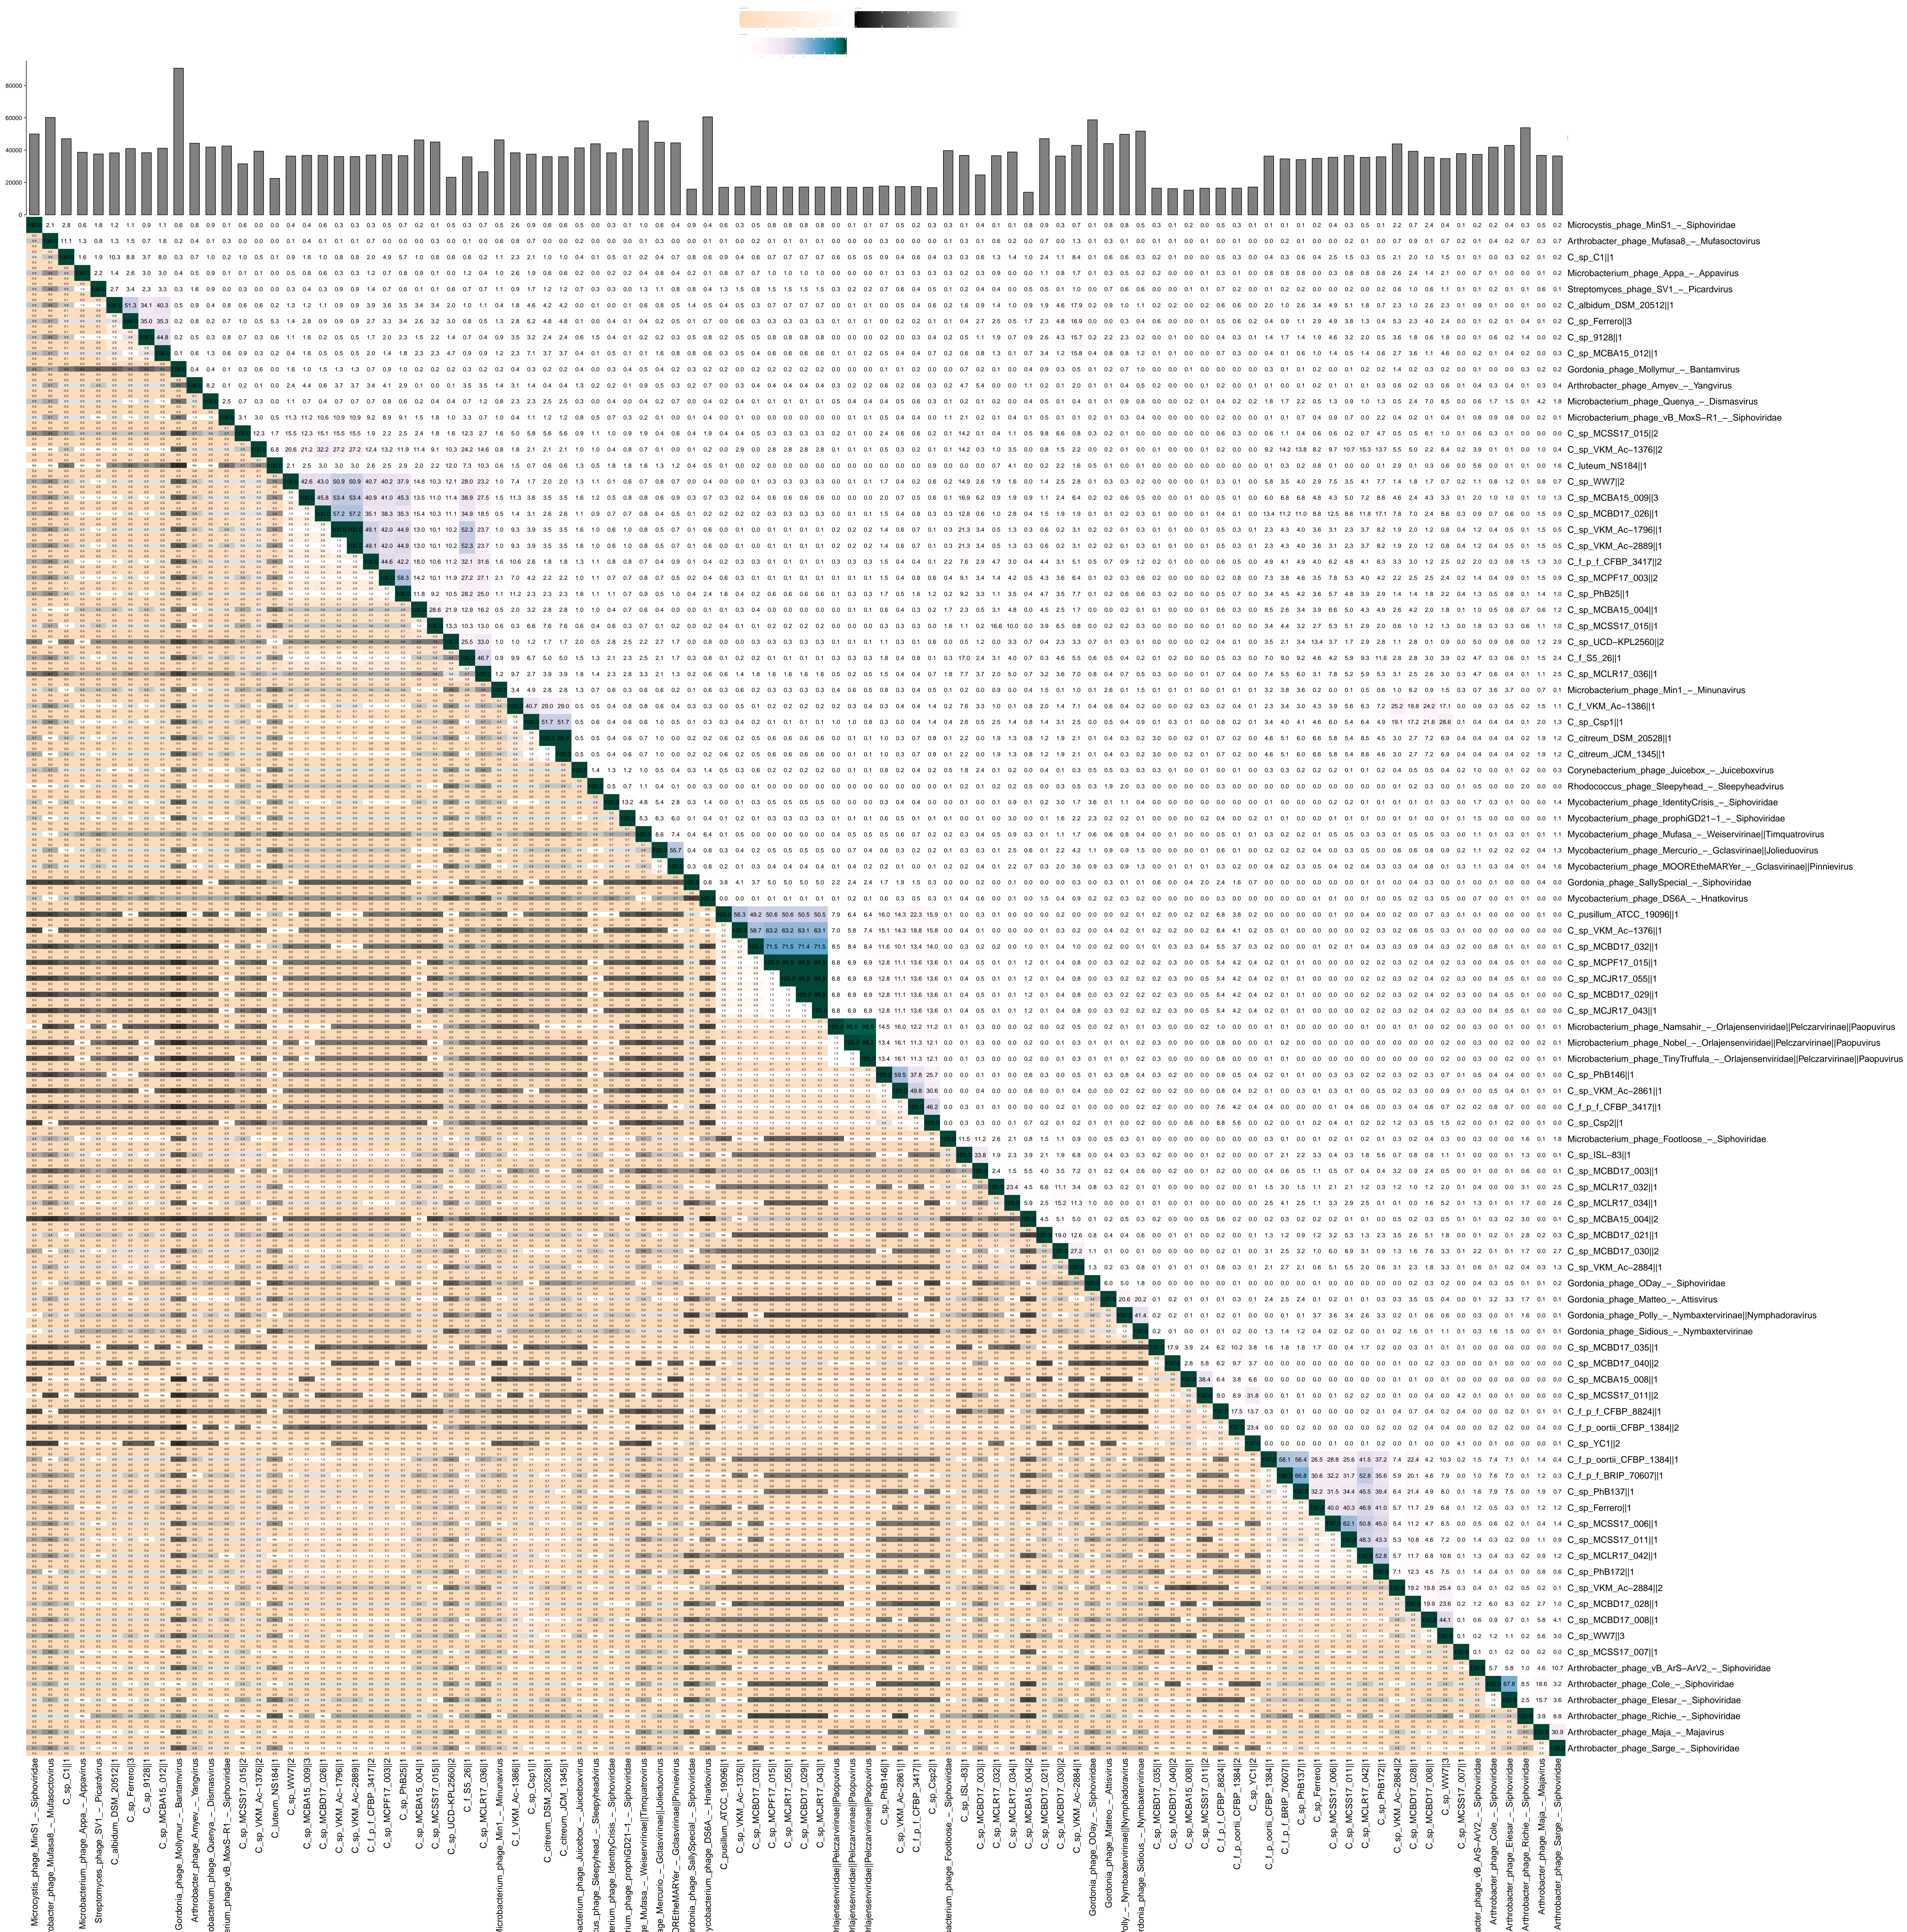

Supplement: s1 [file s1]
